# Supplementary material for: Characterization and Clonal Diffusion of Ceftaroline Non-Susceptible MRSA in Two Hospitals in Central Italy
Source: MDPI journal article supplement (doi:10.3390/antibiotics10081026), 2021-08-23
Supplement: s1 [file s1]

Table S1. Epidemiological characteristics of ceftaroline non-susceptible isolates.

| <b>Strains</b> | <b>Origin</b> | <b>MIC (mg/L)</b> | <b>PFGE pulsotype</b> | <b>Spa-typing</b> | <b>MLST (CC)</b> |
|----------------|---------------|-------------------|-----------------------|-------------------|------------------|
| CMRSA-AN1      | Ancona        | 2                 | A                     | t041              | ST228 (CC5)      |
| CMRSA-AN2      | Ancona        | 4                 | B                     | t041              | ST228 (CC5)      |
| CMRSA-AN3      | Ancona        | 2                 | C                     | t18014            | ST22 (CC22)      |
| CMRSA-AN4      | Ancona        | 4                 | A                     | t041              | ST228 (CC5)      |
| CMRSA-AN5      | Ancona        | 2                 | A                     | t041              | ST228 (CC5)      |
| CMRSA-AN6      | Ancona        | 4                 | D                     | t041              | ST228 (CC5)      |
| CMRSA-AN7      | Ancona        | 4                 | D                     | t041              | ST228 (CC5)      |
| CMRSA-AN8      | Ancona        | 2                 | E                     | t041              | ST228 (CC5)      |
| CMRSA-AN9      | Ancona        | 4                 | F                     | t041              | ST228 (CC5)      |
| CMRSA-AN10     | Ancona        | 2                 | B                     | t041              | ST228 (CC5)      |
| CMRSA-AN11     | Ancona        | 4                 | F                     | t041              | ST228 (CC5)      |
| CMRSA-AN12     | Ancona        | 2                 | G                     | t022              | ST22 (CC22)      |
| CMRSA-FB1      | Fabriano      | 2                 | B                     | t041              | ST228 (CC5)      |
| CMRSA-FB2      | Fabriano      | 4                 | B                     | t041              | ST228 (CC5)      |

Table S2. Antibiotics resistance genes and virulence factors of ceftaroline non-susceptible MRSA.

| Strain            | Spa-type | MLST  | Antibiotics resistance genes |                  |                                                            |                 | Disinfectants resistance genes | Virulence factors                                                                                      |
|-------------------|----------|-------|------------------------------|------------------|------------------------------------------------------------|-----------------|--------------------------------|--------------------------------------------------------------------------------------------------------|
|                   |          |       | $\beta$ -lactams             | MLS <sub>B</sub> | Aminoglycoside                                             | Chloramphenicol |                                |                                                                                                        |
| <b>CMRSA-AN3</b>  | t18014   | ST22  | <i>mecA, blaZ</i>            | <i>erm(C)</i>    | -                                                          | <i>catpC221</i> | -                              | <i>sak, scn, aur, hlgA, hlgB, hlgC, seo, sec, seg, sei, sem, sen, seu</i>                              |
| <b>CMRSA-AN5</b>  | t041     | ST228 | <i>mecA</i>                  | <i>erm(A)</i>    | <i>aac(6')-aph(2''), ant(6)-Ia, aph(3')-III, ant(9)-Ia</i> | -               | -                              | <i>sak, scn, aur, splA, splB, hlgA, hlgB, hlgC, sea, seo</i>                                           |
| <b>CMRSA-AN6</b>  | t041     | ST228 | <i>blaZ, mecA</i>            | <i>erm(A)</i>    | <i>aac(6')-aph(2''), ant(6)-Ia, aph(3')-III, ant(9)-Ia</i> | -               | <i>qacA, qacG</i>              | <i>sak, scn, aur, splA, splB, hlgA, hlgB, hlgC, sea, seo, sec, seg, sei, sem, sen, seu, lukD, Luke</i> |
| <b>CMRSA-AN8</b>  | t041     | ST228 | <i>blaZ, mecA</i>            | <i>erm(A)</i>    | <i>aac(6')-aph(2''), ant(6)-Ia, aph(3')-III, ant(9)-Ia</i> | <i>catpC221</i> | <i>qacA</i>                    | <i>sak, scn, aur, splA, splB, hlgA, hlgB, hlgC, sea, seo</i>                                           |
| <b>CMRSA-AN9</b>  | t041     | ST228 | <i>blaZ, mecA</i>            | <i>erm(A)</i>    | <i>aac(6')-aph(2''), ant(6)-Ia, aph(3')-III, ant(9)-Ia</i> | -               | <i>qacA</i>                    | <i>sak, scn, aur, splA, splB, hlgA, hlgB, hlgC, sea, seo</i>                                           |
| <b>CMRSA-AN12</b> | t022     | ST22  | <i>mecA, blaZ</i>            | <i>erm(C)</i>    | -                                                          | -               | -                              | <i>sak, scn, aur, hlgA, hlgB, hlgC, seo, sec, seg, sei, sem, sen, seu</i>                              |
| <b>CMRSA-FB1</b>  | t041     | ST228 | <i>mecA, blaZ</i>            | <i>erm(A)</i>    | <i>aac(6')-aph(2''), ant(6)-Ia, aph(3')-III</i>            | -               | -                              | <i>sak, scn, aur, splA, splB, hlgA, hlgB, hlgC, sea, seo</i>                                           |
